# Supplementary material for: Revealing the Brønsted-Evans-Polanyi relation in halide-activated fast MoS2 growth toward millimeter-sized 2D crystals
Source: PubMed Central journal article supplement — Sci Adv. 2021 Oct 27;7(44):eabj3274. doi: 10.1126/sciadv.abj3274 (PMC8550239; doi:10.1126/sciadv.abj3274), 2021-10-27
Supplement: sciadv.abj3274_sm.pdf [file sciadv.abj3274_sm.pdf]

Supplementary Materials for

**Revealing the Brønsted-Evans-Polanyi relation in halide-activated fast  
MoS<sub>2</sub> growth toward millimeter-sized 2D crystals**

Qingqing Ji, Cong Su\*, Nannan Mao, Xuezheng Tian, Juan-Carlos Idrobo, Jianwei Miao,  
William A. Tisdale, Alex Zettl, Ju Li, Jing Kong\*

\*Corresponding author. Email: [csu@berkeley.edu](mailto:csu@berkeley.edu) (C.S.); [jingkong@mit.edu](mailto:jingkong@mit.edu) (J.K.)

Published 27 October 2021, *Sci. Adv.* **7**, eabj3274 (2021)  
DOI: [10.1126/sciadv.abj3274](https://doi.org/10.1126/sciadv.abj3274)

**This PDF file includes:**

Figs. S1 to S11  
Tables S1 to S3

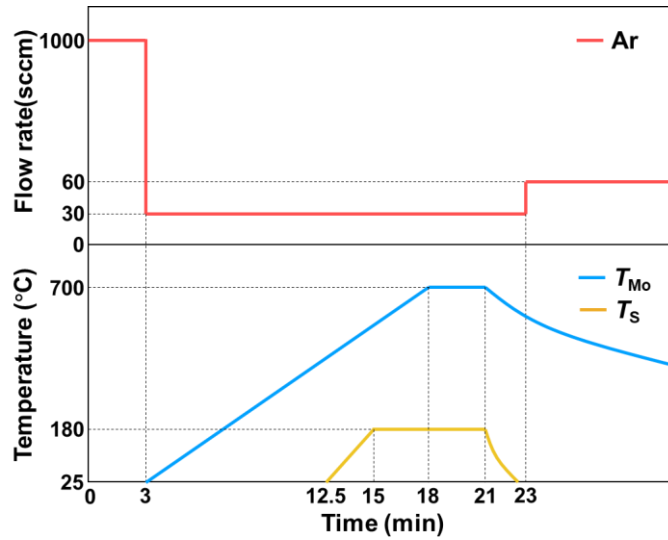

Fig. S1. A typical program of the halide-assisted MoS<sub>2</sub> growth.

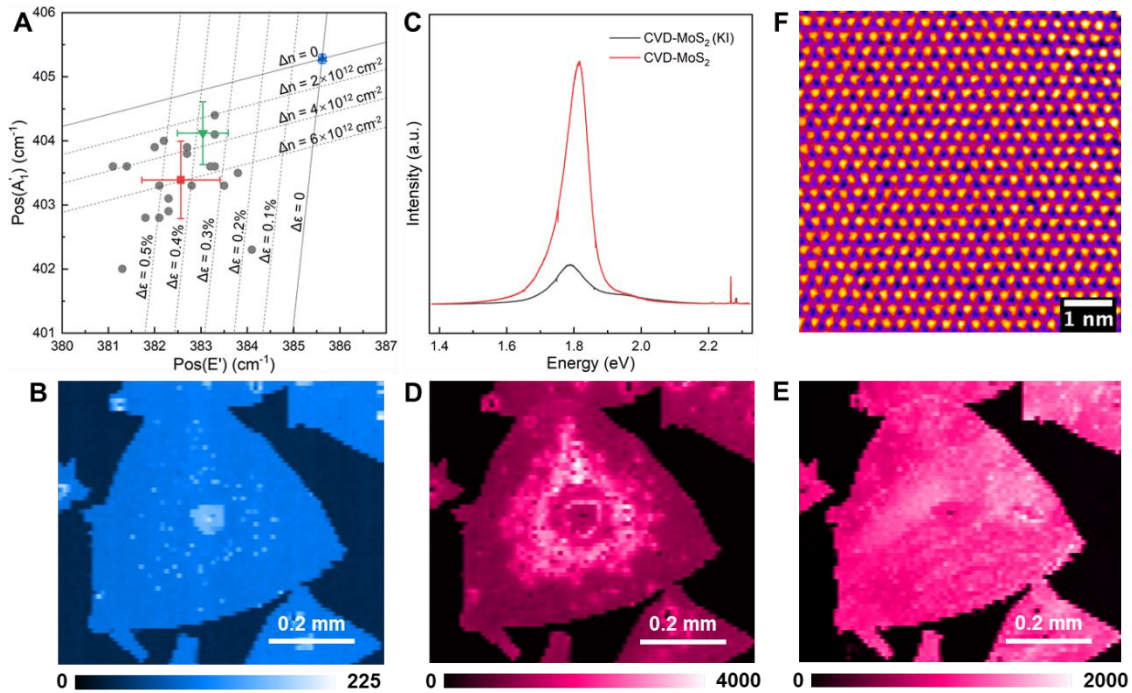

**Fig. S2. Characterizations of the KI-assisted grown MoS<sub>2</sub>.** (A) Raman characterization. The grey circles are data points of the E' and A<sub>1</sub>' peak positions. The red square is the average result for our MoS<sub>2</sub> sample, while the green and blue data points are for MoS<sub>2</sub> samples produced by conventional CVD and mechanical exfoliation, respectively. (B) Raman mapping (A<sub>1</sub>' peak intensity) image of the large-domain MoS<sub>2</sub> crystal shown in Fig. 1C of the main text. (C) Photoluminescence (PL) spectra of the monolayer MoS<sub>2</sub> samples produced by KI-assisted growth (black) and conventional CVD (red). The weaker PL of the KI-assisted grown sample might be associated with the higher electron doping level as reflected in (A). (D) PL intensity mapping of the 2D MoS<sub>2</sub> crystal in Fig. 1C. (E) PL intensity mapping of the 2D crystal after transfer onto a new SiO<sub>2</sub>/Si substrate. The nonuniform PL intensity before transfer might be due to the strain inhomogeneity in the large-size 2D crystal, which is released and contributes to uniform PL after transfer. (F) HAADF image of a representative area of the MoS<sub>2</sub> crystal lattice. No iodine atoms can be seen in the field of view (shown as very bright atoms occupying S sites), proving that they are not involved in the final product at a detectable level. We have imaged quite a number of locations and verified the absence of iodine or potassium

doping.

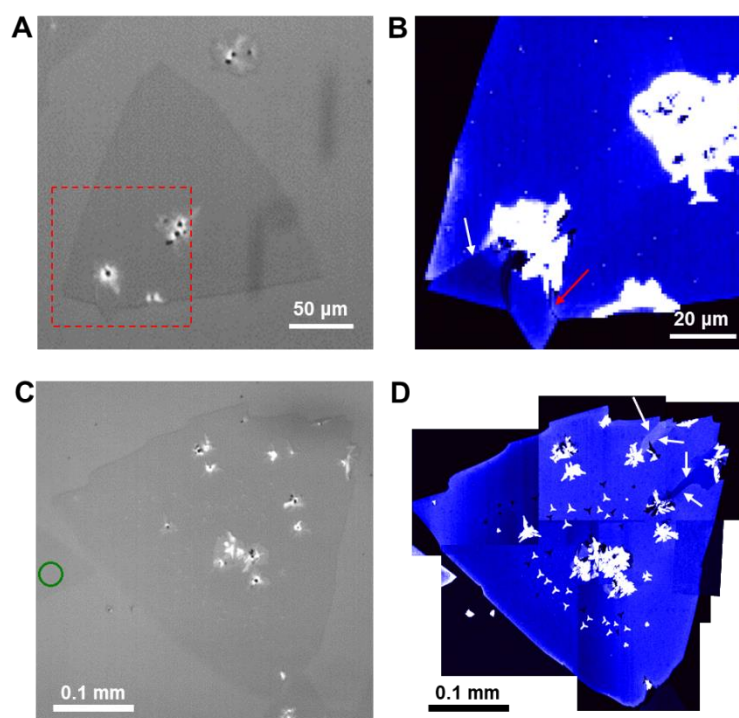

**Fig. S3. SHG mapping images of the large-domain MoS<sub>2</sub>.** (A) Optical image of the 2D MoS<sub>2</sub> crystal same as that in Fig. 1D. (B) Second-harmonic generation mapping of the lower left part in (A), showing grain boundaries (GBs) marked with arrows. Note that the red arrow indicates an antiparallel GB with adjacent areas having identical SHG intensity. (C) Optical image of the 2D crystal with a domain size of ~0.4 mm. (D) Corresponding SHG image of the entire flake by stitching several SHG mapping images. The main body of the 2D flake is free of GBs except at the top right corner (GBs marked with white arrows).

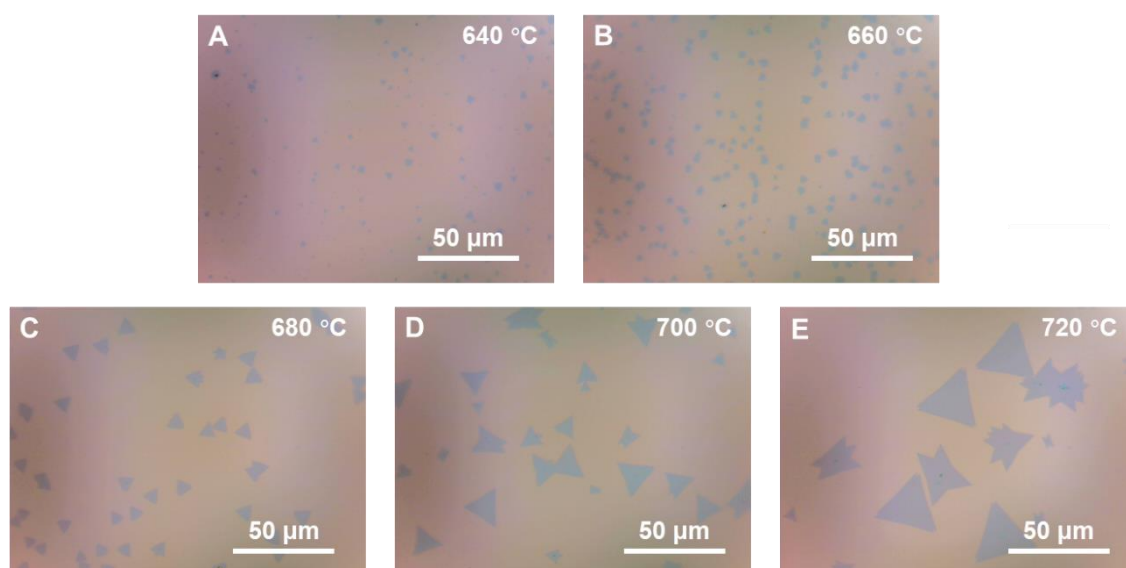

**Fig. S4. Optical images of the 2D MoS<sub>2</sub> crystals grown without any halide promoter.** Top right of each image

indicates the growth temperature ( $T_{M0}$ ). Sulfur heating temperature  $T_S = 180\text{ }^\circ\text{C}$ .

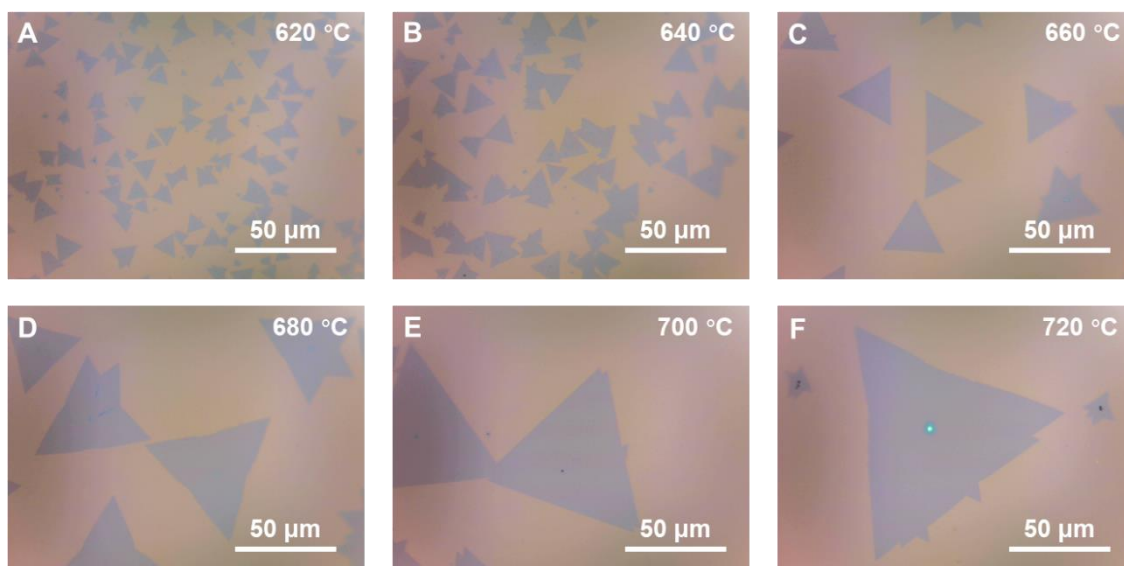

**Fig. S5. Optical images of the 2D MoS<sub>2</sub> crystals grown with KI promoter.** Top right of each image indicates the growth temperature. Sulfur heating temperature  $T_S = 180\text{ }^\circ\text{C}$ .

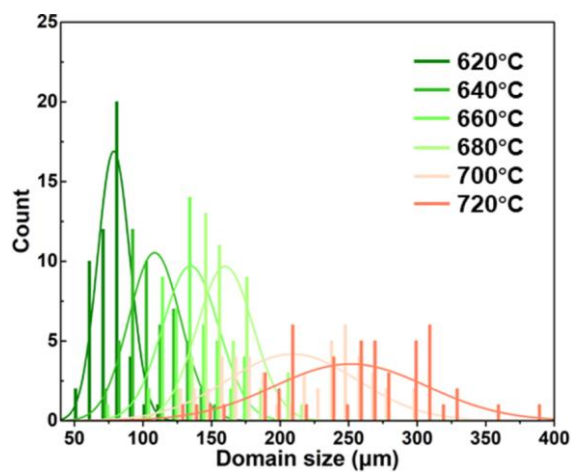

**Fig. S6. Domain size statistics of the 2D MoS<sub>2</sub> crystals grown with KI promoter at  $T_S = 170\text{ }^\circ\text{C}$ .**

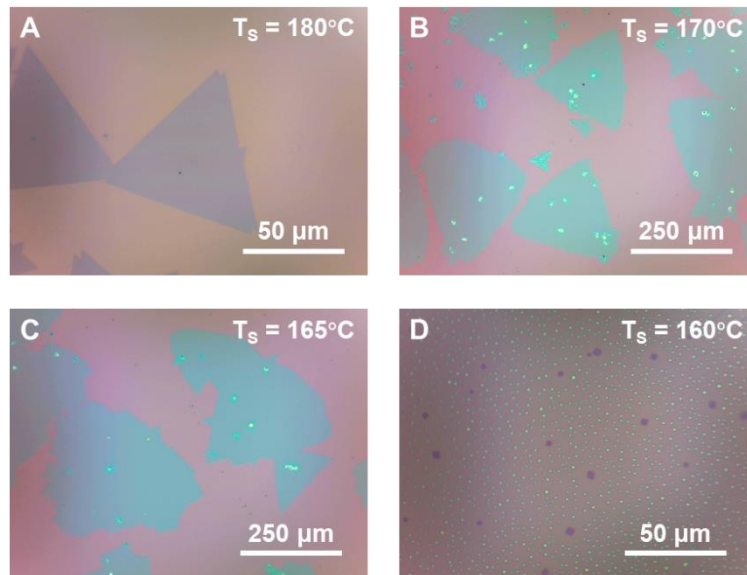

**Fig. S7. Optical images of the 2D MoS<sub>2</sub> crystals grown with KI promoter at  $T_{Mo} = 700$  °C.** Top right of each image indicates the sulfur heating temperature. The green particles in the lower right image are likely the unsulfurized potassium molybdate droplets. This result is similar to the surface morphology grown without sulfur supply.

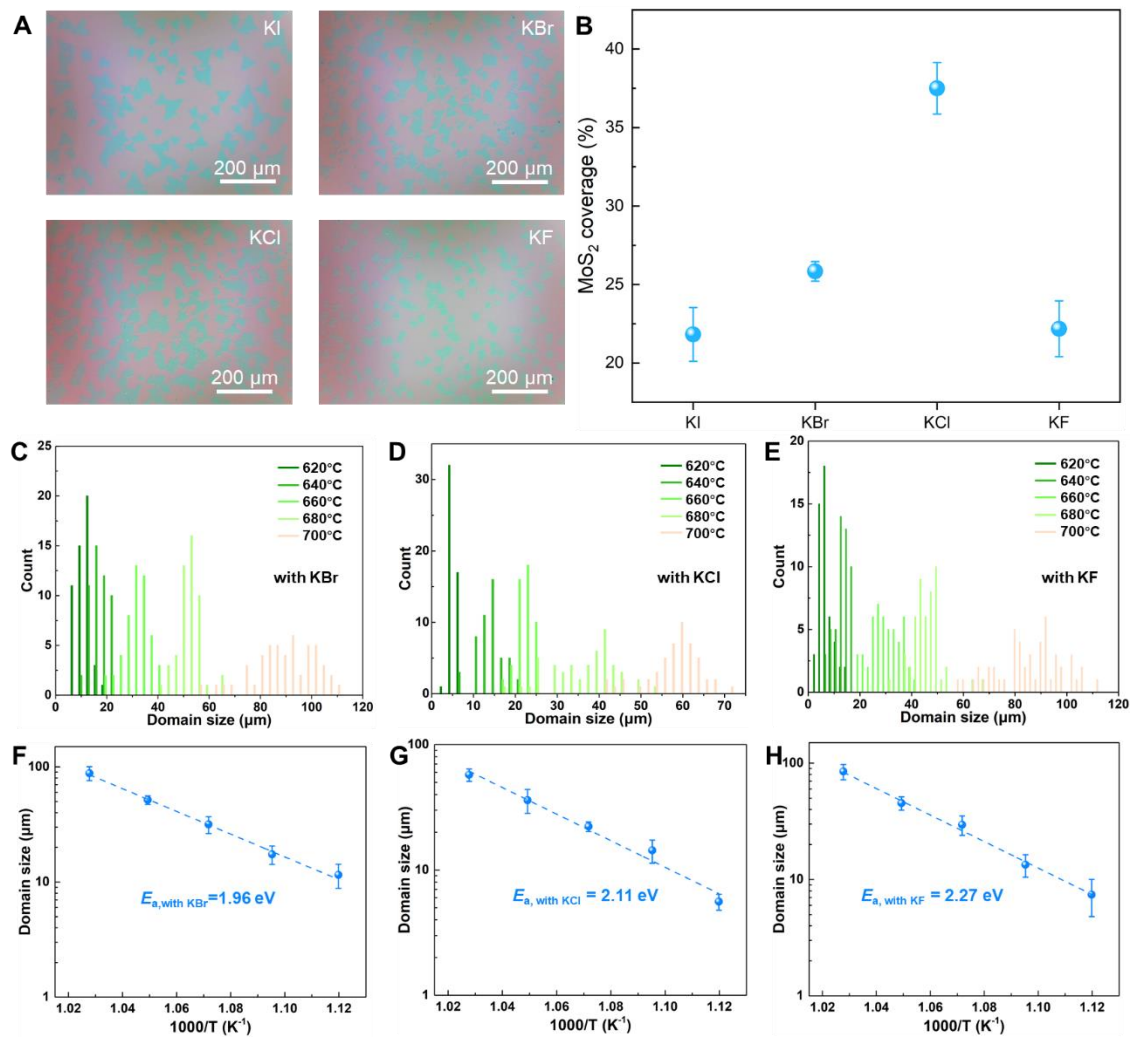

**Fig. S8. MoS<sub>2</sub> growth results assisted by different halide salts. (A)** Optical images of MoS<sub>2</sub> grown at 680 °C with

presence of different potassium halides. **(B)** Calculated MoS<sub>2</sub> coverage dependent on the salts. **(C-E)**  $T_{\text{Mo}}$ -dependent domain size statistics of the 2D MoS<sub>2</sub> crystals grown with **(C)** KBr, **(D)** KCl, and **(E)** KF promoters. **(F-H)** Corresponding Arrhenius plots of the average domain size versus  $1000/T$  for the three cases. The derived reaction barriers are found to increase in the sequence of KI (1.80 eV, Fig. 2B in the main text), KBr (1.96 eV), KCl (2.11 eV), and KF (2.27 eV).

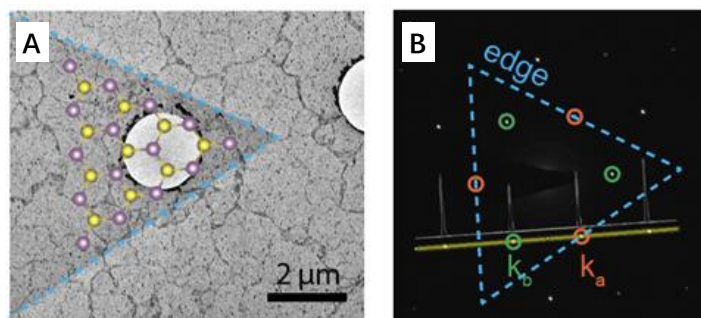

**Fig. S9. Determining the MoS<sub>2</sub> edge type by electron diffraction.** Large field-of-view TEM image on the edge of a 2D MoS<sub>2</sub> crystal **(A)** and corresponding SAED pattern **(B)**. The extracted line profile categorizes the first-order diffraction points into two groups by intensity, which are marked with green and orange circles. The higher-intensity group ( $k_a$ ), which point towards the flake edges, are associated with zigzag-Mo edge type.

**Table S1. The Mo edges passivated by halogen atoms and oxygen.**

|    | zigzag Mo edge                                                                      | antenna Mo edge                                                                      |
|----|-------------------------------------------------------------------------------------|--------------------------------------------------------------------------------------|
| F  | 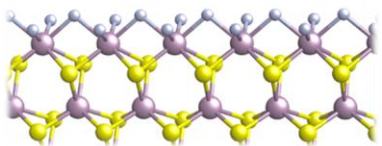 |  |
| Cl |  |  |
| Br |  |  |
| I  |  |  |
| O  |  |  |

**Table S2. The S edges stabilized by halogen atoms and oxygen.**

|                     | zigzag S edge                                                                     | antenna S edge                                                                     |
|---------------------|-----------------------------------------------------------------------------------|------------------------------------------------------------------------------------|
| <b>F</b>            | 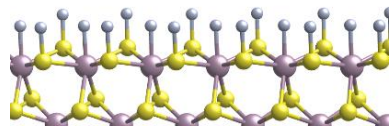 |  |
| <b>Cl, Br, I, O</b> | Not stable                                                                        | Not stable                                                                         |

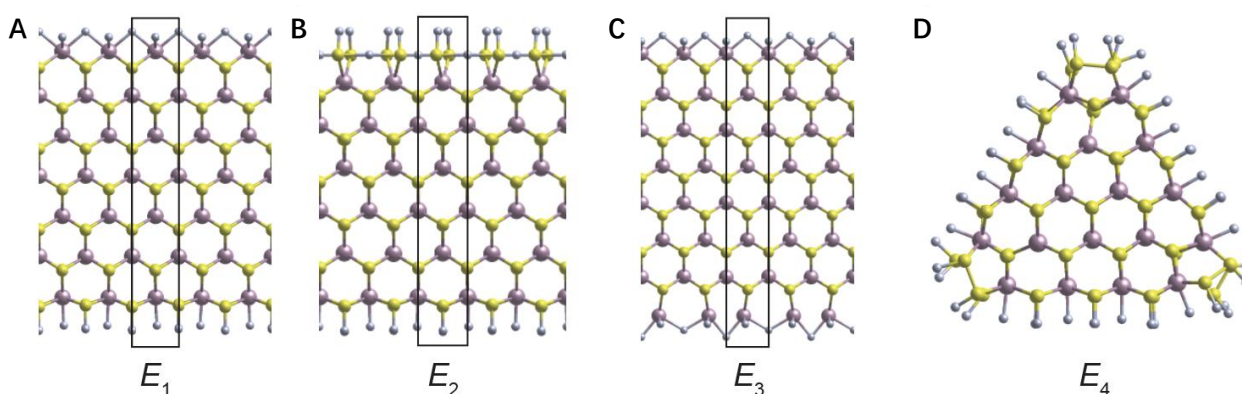

**Fig. S10. The nanostructures used for calculating the formation energies of different edges.** The above images are examples of F-passivated edges which include (A) zigzag-Mo and zigzag-S; (B) antenna-S and zigzag-S; (C) zigzag-Mo and antenna-Mo; and (D) the nano-island including zigzag-S and antenna-S. The unit length used for defining the edge formation energy has been marked by black rectangles in these images.

**Table S3. List of  $N_1$ ,  $N_2$ ,  $N_3$ , and  $N_4$  numbers for calculating the edge formation energies by Eq. (3).**

|    | $N_1$ | $N_2$ | $N_3$ | $N_4$ |
|----|-------|-------|-------|-------|
| F  | 6     | 6     | 6     | 45    |
| Cl | 1.5   | 0     | 3.5   | 0     |
| Br | 1.5   | 0     | 3.5   | 0     |
| I  | 1.5   | 0     | 2     | 0     |
| O  | 2     | 0     | 4.5   | 0     |

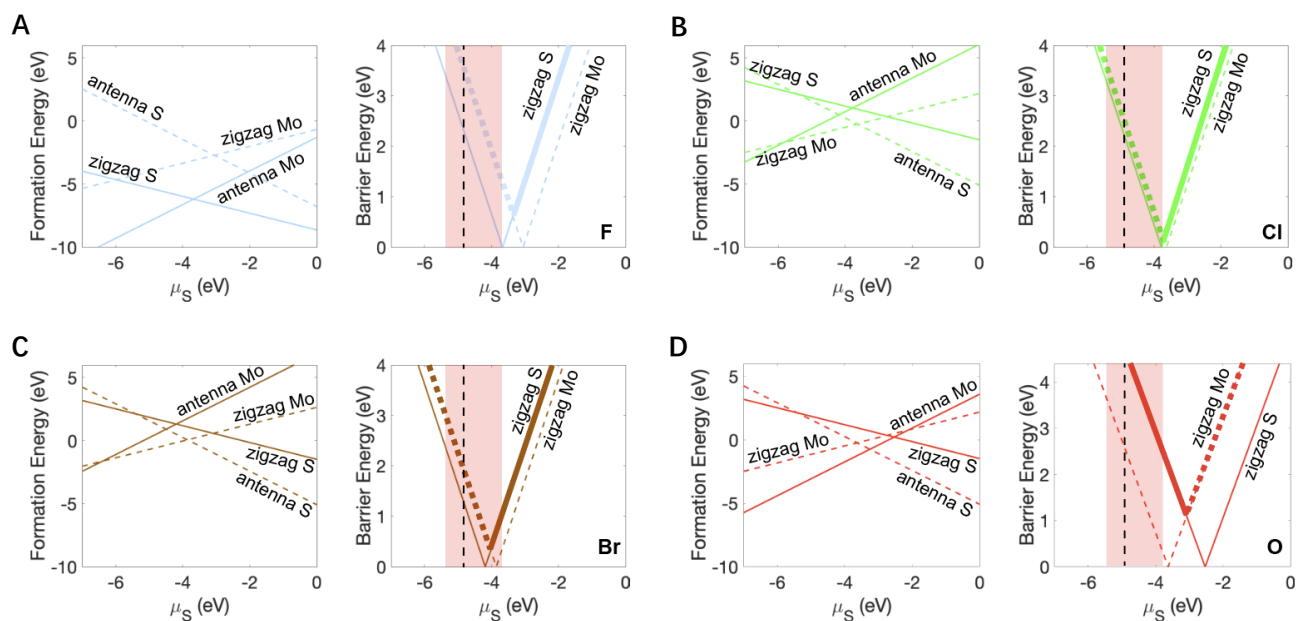

**Fig. S11 DFT calculations of the MoS<sub>2</sub> growth reaction barriers.** The calculations are based upon (A) fluorine, (B) chlorine, (C) bromine, and (D) oxygen edge passivation. Each left panel exhibits the formation energies of the four kinds of edges (zigzag-Mo, antenna-S, zigzag-S, and antenna-Mo), whose atomic configurations passivated by halogen/oxygen is depicted in Table S1 and S2. Shaded regions in the right panels indicate accessible  $\mu_S$ , and the vertical dash lines mark the position of  $\mu_S = -4.9$  eV that we use to find the halogen-dependent reaction barriers for the plot of Fig. 4C in the main text.
